# Supplementary material for: Spontaneous resolution and absolute configuration of a coordination polymer formed by MnII and a ferrocene-based bisnitronyl nitroxide radicalElectronic supplementary information available: Experimental procedure. See http://www.rsc.org/suppdata/cc/b2/b205722k/
Source: Royal Society of Chemistry journal article supplement (doi:10.1039/b205722k), 2002-09-18
Supplement: b205722k.doc [file b205722k.doc]

**Spontaneous resolution and absolute configuration of a coordination polymer formed by MnII and a ferrocene-based bisnitronyl nitroxide radical**

**Christian Sporer, Klaus Wurst, David B. Amabilino, Daniel Ruiz-Molina, Holger Kopacka, Peter Jaitner and Jaume Veciana**

Experimental part: 100 mg Mn(hfac)2  3H2O (0.191 mmol, Aldrich) were dried by azeotropic distillation of the water in n-heptane. At ambient temperature 100 mg ferrocenyldiradical (ref.6) (0.202 mmol) in 15 ml of dry CH2Cl2  were added. The mixture was stirred for 5 min, filtered and stored at -10 oC where after three days small dark crystals of **1** were isolated in a nearly quantitative yield. Mp: 126-127 oC; IR (KBr): 3135w, 3062w, 1659vs, 1555s, 1528s, 1510s, 1375m, 1342s, 1312s, 1258vs, 1204vs, 1150vs.
